# Supplementary material for: Identification of HIF-2α-regulated genes that play a role in human microvascular endothelial sprouting during prolonged hypoxia in vitro
Source: PubMed Central journal article supplement (PMC5306362; doi:10.1007/s10456-016-9527-4), 2016-10-03
Supplement: 10456_2016_9527_MOESM1_ESM.pdf [file 10456_2016_9527_MOESM1_ESM.pdf]

**Supplementary Table 1. Primer sequences for qRT-PCR**

| <b>Gene Symbol</b>  | <b>Forward Primer</b>   | <b>Reverse Primer</b>   |
|---------------------|-------------------------|-------------------------|
| <b>B2M [1]</b>      | TTTCATCCATCCGACATTG     | CGGCAGGCATACTCATCTTT    |
| <b>ARRDC3</b>       | GCGAAAGTACGCTGGACTGA    | TGAGGTAGCGAGTGGTGTCT    |
| <b>CA12</b>         | ACTTATTTTGGTCCTGATGGGG  | TGGCCATTGTTGGTCAGGAG    |
| <b>CDKN3</b>        | CTTGTCTTGTAGCTGCTTGTCTC | TGCAGCTAATTTGTCCCGAAAC  |
| <b>FAM189A2 [2]</b> | CTTGAGGACCAGGTCGAAGAGT  | CTCCTTTCAGTCTGTGTTGCAGC |
| <b>MME [2]</b>      | CTTTAGTGCCAGCAGTCCAAC   | CACCAGTCAACGAGGTCTCCAT  |
| <b>PLXNA4 [2]</b>   | TCGTGCGGATTGAGCCAGAATG  | TGATGTGCTCCTTCCCTCCATG  |
| <b>PPARG</b>        | CGACCAGCTGAATCCAGAGT    | GATGCGGATGGCCACCTCTT    |
| <b>PTP4A3</b>       | ACAAGCACAGGGATCTCGTT    | CTTCAGGTCCTCAATGAAGGTG  |
| <b>RALGPS2</b>      | GCAGTCAGTCCTCTGTTGCT    | TCTGACCCGCATATTCTTCTGG  |
| <b>SNX33</b>        | GCTTTGTGCGTTCTGGAGTG    | TGGTCTGTTTTGTGGGGTCC    |
| <b>TM4SF18</b>      | ATGTTGCCAGAGTGAAAAGTGC  | CTGTAAGGAAACGTCCAGCA    |
| <b>TMEM121 [2]</b>  | AGCACATAGCGCCGAGAAGAT   | CGTTTTTGCCGACGAAGATGGC  |
| <b>ZNF292</b>       | GTGTGAAGATGGCGGACGAA    | GCATATTCTAGGAGTGTCTGGCA |

## References

1. Weijers EM, van Wijhe MH, Joosten L, et al. (2010) Molecular weight fibrinogen variants alter gene expression and functional characteristics of human endothelial cells. *J Thromb Haemost* 8:2800–9. doi: 10.1111/j.1538-7836.2010.04096.x
2. OriGene. <http://www.origene.com/>. Accessed 29 Jan 2016
