# Supplementary material for: Identification of HIF-2α-regulated genes that play a role in human microvascular endothelial sprouting during prolonged hypoxia in vitro
Source: PubMed Central journal article supplement (PMC5306362; doi:10.1007/s10456-016-9527-4), 2016-10-03
Supplement: 10456_2016_9527_MOESM2_ESM.pdf [file 10456_2016_9527_MOESM2_ESM.pdf]

**Supplementary Table 2. All genes with significantly induced or repressed gene expression in prolonged hypoxic precultured hMVECs after VEGF-A/TNF- $\alpha$  stimulation.**

| Upregulated in Hypoxia |             | Downregulated in Hypoxia |             |
|------------------------|-------------|--------------------------|-------------|
| Gene                   | Fold Change | Gene                     | Fold Change |
| ABCC3                  | 2.1         | A1BG,ZNF497              | 0.55        |
| ABTB1                  | 1.5         | A1BG-AS1                 | 0.53        |
| ACCN3                  | 1.9         | AATK                     | 0.64        |
| ACER2                  | 1.7         | ABCA6                    | 0.52        |
| ACTR3C                 | 4.1         | ACPL2                    | 0.46        |
| ADAMTS3                | 1.7         | ACTR3B                   | 0.66        |
| ADAMTSL3               | 1.6         | ADAM19                   | 0.65        |
| ADM                    | 3.5         | ADAMTS12                 | 0.38        |
| ADM2                   | 2.4         | ADAMTS18                 | 0.46        |
| ADPRH                  | 1.8         | ADAT2                    | 0.64        |
| ADRB1                  | 2.3         | ADC                      | 0.44        |
| ADSSL1                 | 2.8         | AGAP11,C10orf116         | 0.51        |
| AEBP1,MIR4649          | 2.9         | AGPAT9                   | 0.57        |
| AGMO                   | 2.8         | ALDH1A3                  | 0.63        |
| AIM1                   | 1.7         | ALDH4A1,MIR4695          | 0.53        |
| AJUBA                  | 1.9         | AMD1                     | 0.66        |
| AK4                    | 2.8         | ANKRD23,ANKRD39          | 0.58        |
| ALDOA                  | 1.6         | ANKRD55                  | 0.48        |
| ALDOC                  | 2.2         | ANLN                     | 0.45        |
| ALPK3,ZNF592           | 1.5         | ANXA6                    | 0.63        |
| AMIGO2                 | 2.5         | ARHGAP11A,SCG5           | 0.52        |
| ANGPTL4                | 4.0         | ARHGAP5-AS1              | 0.66        |
| ANK1                   | 2.1         | ARMCX2                   | 0.67        |
| ANKRD37                | 7.4         | ASF1B                    | 0.35        |
| ANKRD53                | 2.6         | ATAD3A,ATAD3B            | 0.66        |
| ANO2                   | 2.0         | ATF7IP2                  | 0.67        |
| ANTXR2                 | 1.5         | ATP2B4                   | 0.66        |
| ANXA3                  | 1.8         | ATP6V0E2                 | 0.43        |
| ARHGAP21               | 1.6         | AURKA                    | 0.57        |
| ARHGAP4                | 1.7         | AURKB                    | 0.26        |
| ARHGEF40               | 1.8         | B9D1                     | 0.64        |
| ARID5A                 | 1.7         | BCAN                     | 0.48        |
| ARRDC3                 | 4.3         | BHLHE41                  | 0.51        |
| ARRDC4                 | 3.8         | BIRC5                    | 0.31        |
| ATF3                   | 2.0         | BRCA1                    | 0.44        |
| B3GALT4                | 2.0         | BRI3BP                   | 0.66        |
| BACH1                  | 3.3         | BTBD11                   | 0.36        |
| BAIAP2L1               | 1.5         | BUB1                     | 0.31        |

|                      |     |                               |      |
|----------------------|-----|-------------------------------|------|
| BATF                 | 1.9 | BUB1B,PAK6                    | 0.35 |
| BATF3,NSL1           | 1.6 | C10orf125                     | 0.65 |
| BCAR1                | 1.7 | C11orf96                      | 0.53 |
| BCL6                 | 1.5 | C16orf59                      | 0.56 |
| BEST1                | 1.9 | C17orf28                      | 0.61 |
| BEST4,PTCH2,TCTEX1D4 | 1.8 | C1orf233                      | 0.60 |
| BEX5                 | 1.8 | C20orf27                      | 0.61 |
| BGN                  | 2.6 | C2CD4A                        | 0.44 |
| BHLHE40              | 1.9 | C6orf97                       | 0.55 |
| BHMT2                | 2.8 | CADM4                         | 0.56 |
| BMF                  | 1.7 | CAMK1                         | 0.64 |
| BMP4                 | 2.3 | CAMK2N1                       | 0.66 |
| BMPER                | 3.0 | CBLN2                         | 0.55 |
| BNIP3                | 1.6 | CBX6                          | 0.64 |
| BNIP3L               | 2.0 | CCDC102B                      | 0.56 |
| BTG1,LOC256021       | 1.7 | CCDC147                       | 0.61 |
| C10orf10             | 1.5 | CCDC165                       | 0.63 |
| C11orf35             | 1.8 | CCDC169,CCDC169-SOHLH2,SOHLH2 | 0.46 |
| C12orf39             | 2.0 | CCNB2,MYO1E                   | 0.55 |
| C15orf48,MIR147B     | 2.4 | CCND1                         | 0.65 |
| C1orf133             | 6.9 | CCNE1                         | 0.39 |
| C1orf21              | 1.8 | CCNE2                         | 0.49 |
| C1QTNF1              | 2.9 | CD34                          | 0.58 |
| C1R                  | 1.6 | CDC20                         | 0.36 |
| C20orf96             | 1.5 | CDC45                         | 0.19 |
| C21orf7              | 1.9 | CDCA2                         | 0.28 |
| C3orf15              | 1.6 | CDCA5,LOC100130348            | 0.59 |
| C4orf3               | 1.7 | CDCA8                         | 0.37 |
| C4orf47              | 3.8 | CDK1                          | 0.24 |
| C6orf132             | 2.3 | CDKN2A                        | 0.32 |
| C7orf29,LRRC61       | 3.2 | CDKN3                         | 0.64 |
| C7orf31              | 1.8 | CENPA                         | 0.31 |
| C7orf58              | 2.2 | CENPM                         | 0.38 |
| C7orf61              | 1.9 | CEP55                         | 0.28 |
| C7orf63              | 1.5 | CES4A                         | 0.64 |
| C8orf4               | 1.6 | CGNL1                         | 0.63 |
| C8orf58              | 1.7 | CHAC2                         | 0.65 |
| C9orf5               | 2.3 | CHAF1B                        | 0.56 |
| CA11                 | 1.7 | CHCHD10                       | 0.66 |
| CA12                 | 2.0 | CHN2                          | 0.47 |
| CA2                  | 6.5 | CHTF18                        | 0.64 |
| CABP4                | 1.6 | CIT,MIR1178                   | 0.44 |

|                       |     |                  |      |
|-----------------------|-----|------------------|------|
| CACNA1A               | 1.6 | CKAP2L           | 0.40 |
| CACNA1C               | 2.2 | CLEC7A           | 0.54 |
| CAMK1D,LOC283070      | 2.2 | CLSPN            | 0.35 |
| CAPN12                | 2.1 | CORO1A,LOC606724 | 0.51 |
| CARHSP1               | 1.5 | CORO2B           | 0.57 |
| CBS                   | 1.6 | CPE              | 0.47 |
| CCL20                 | 1.8 | CRHR1,MGC57346   | 0.67 |
| CCL28                 | 2.2 | CXCL6            | 0.64 |
| CCNG2                 | 1.5 | CXorf36          | 0.18 |
| CCR10                 | 1.5 | CYP2S1           | 0.24 |
| CCRN4L                | 1.6 | CYTTL1           | 0.57 |
| CD101                 | 1.5 | DCBLD2           | 0.65 |
| CD302,LY75,LY75-CD302 | 1.8 | DGAT2            | 0.61 |
| CD69                  | 2.3 | DGKG             | 0.54 |
| CDCP1                 | 2.0 | DHRS11           | 0.49 |
| CDH2                  | 2.9 | DLGAP5           | 0.28 |
| CEBPD                 | 1.6 | DLL1             | 0.53 |
| CELSR1                | 1.6 | DNAJB4           | 0.54 |
| CEP112                | 1.6 | DNAJC6           | 0.61 |
| CEP135                | 1.7 | DPY19L3          | 0.62 |
| CHAC1                 | 2.4 | DPYSL4           | 0.66 |
| CHRNB1                | 1.5 | EDNRB            | 0.62 |
| CHRNE                 | 1.9 | EFNB2            | 0.64 |
| CHST2                 | 1.6 | ELOVL6           | 0.51 |
| CHST6                 | 1.9 | EME1             | 0.36 |
| CHSY3                 | 1.8 | EPHX1            | 0.55 |
| CLCN4                 | 1.7 | ERCC2            | 0.66 |
| CLDN14                | 2.3 | FAM101B          | 0.67 |
| CLDN23                | 2.0 | FAM102A          | 0.63 |
| CLDN7                 | 1.7 | FAM109A          | 0.61 |
| CLEC2B                | 1.8 | FAM117A          | 0.65 |
| CMPK2                 | 1.6 | FAM171A2         | 0.56 |
| COL12A1               | 2.7 | FAM212B          | 0.53 |
| COL1A2                | 6.0 | FAM216A          | 0.61 |
| COL8A2                | 2.9 | FAM54A           | 0.58 |
| CPLX1                 | 3.1 | FAM59B           | 0.52 |
| CRNDE                 | 1.5 | FAM83D           | 0.25 |
| CSPG4                 | 2.9 | FANCA            | 0.54 |
| CSPG5                 | 2.9 | FANCD2           | 0.48 |
| CSRP2                 | 2.0 | FANK1            | 0.60 |
| CTF1                  | 1.8 | FEN1             | 0.64 |
| CXCR7                 | 1.9 | FKBP14           | 0.65 |
| CYP1A1                | 2.0 | FLJ42627         | 0.56 |

|               |       |                                                                |      |
|---------------|-------|----------------------------------------------------------------|------|
| CYP27A1,TTLL4 | 1.9   | FN3K                                                           | 0.67 |
| CYP2J2        | 1.6   | FRMD5                                                          | 0.60 |
| DACT1         | 4.5   | GADL1                                                          | 0.36 |
| DAPK2         | 1.6   | GAMT                                                           | 0.55 |
| DARS          | 1.6   | GCAT                                                           | 0.47 |
| DCHS1         | 1.6   | GFOD1                                                          | 0.57 |
| DDIT3         | 1.7   | GINS1                                                          | 0.55 |
| DDIT4         | 3.6   | GINS2                                                          | 0.21 |
| DDX43         | 2.5   | GMFB                                                           | 0.61 |
| DNAH5         | 1.7   | GREB1L                                                         | 0.63 |
| DNAJC18       | 1.6   | GTF2IP1,LOC100093631                                           | 0.59 |
| DNMT3A        | 1.5   | GTSE1                                                          | 0.32 |
| DOCK2         | 1.6   | HBEGF                                                          | 0.56 |
| DTX4          | 1.8   | HCN2                                                           | 0.57 |
| DUSP5P,RHOU   | 1.6   | HES7                                                           | 0.53 |
| DYRK2         | 1.8   | HEY2                                                           | 0.64 |
| EBF4          | 3.5   | HIF1A                                                          | 0.53 |
| EBI3          | 1.8   | HJURP                                                          | 0.38 |
| EDIL3         | 1.5   | HMMR                                                           | 0.41 |
| EFNA1         | 1.7   | HMOX1                                                          | 0.19 |
| EGLN1         | 1.7   | HS3ST1                                                         | 0.55 |
| EGLN3         | 106.8 | IFI27L1                                                        | 0.66 |
| ENKUR         | 1.7   | IFI27L2                                                        | 0.66 |
| ENO2          | 3.1   | IGF1                                                           | 0.16 |
| ENO3          | 1.6   | IL6R                                                           | 0.61 |
| EPB41L3       | 1.7   | IPW,SNORD116-17,SNORD116-21,SNORD116-24,SNORD116-26,SNORD116-4 | 0.67 |
| EPST11        | 1.5   | JAG1                                                           | 0.66 |
| ERO1LB        | 1.6   | KIAA0513                                                       | 0.63 |
| ERRFI1        | 3.8   | KIAA1274                                                       | 0.36 |
| F2RL3         | 5.8   | KIF11                                                          | 0.60 |
| FAIM          | 1.5   | KIF19                                                          | 0.36 |
| FAM102B       | 1.5   | KIF20B                                                         | 0.58 |
| FAM115C       | 2.5   | KIF22                                                          | 0.66 |
| FAM117B       | 1.8   | KIF23                                                          | 0.57 |
| FAM13A        | 3.7   | KIF2C                                                          | 0.33 |
| FAM150B       | 3.9   | KIF4A                                                          | 0.39 |
| FAM160A1      | 1.9   | KIFC1                                                          | 0.35 |
| FAM167B       | 1.6   | KLHL4                                                          | 0.67 |
| FAM189A2      | 1.6   | KYNU                                                           | 0.07 |
| FAM26F        | 3.0   | L2HGDH                                                         | 0.50 |

|                                 |      |              |      |
|---------------------------------|------|--------------|------|
| FAM46A                          | 1.9  | L3MBTL3      | 0.62 |
| FAM46C                          | 1.9  | LAMA3        | 0.60 |
| FBLN7                           | 2.1  | LAPTM4B      | 0.61 |
| FER1L4                          | 2.3  | LDB2         | 0.57 |
| FLJ13197                        | 1.9  | LDLRAD2      | 0.59 |
| FLJ32224                        | 2.7  | LINC00520    | 0.47 |
| FLJ34503                        | 2.0  | LOC100507053 | 0.61 |
| FLJ44511                        | 1.5  | LOC100507254 | 0.35 |
| FOXS1                           | 2.0  | LOC284751    | 0.62 |
| FST                             | 3.1  | LOC285758    | 0.65 |
| FXVD2,FXVD6,FXVD6-<br>FXVD2     | 1.9  | LOC388849    | 0.66 |
| FZD8                            | 1.7  | LOC401052    | 0.43 |
| GABRE,MIR452                    | 1.7  | LOC728084    | 0.40 |
| GADD45B                         | 2.1  | LRP3         | 0.63 |
| GAL3ST4                         | 3.5  | LRRC20       | 0.36 |
| GALM                            | 2.0  | LRRC33       | 0.50 |
| GALNTL4                         | 2.3  | LRRC8B       | 0.51 |
| GATA6                           | 1.6  | LST1         | 0.44 |
| GCNT4                           | 1.9  | MAPKAPK3     | 0.62 |
| GEM                             | 2.2  | MAPRE3       | 0.63 |
| GHDC                            | 2.1  | MARCKSL1     | 0.64 |
| GHRL                            | 1.8  | MCM4         | 0.48 |
| GIMAP1,GIMAP1-<br>GIMAP5,GIMAP5 | 2.1  | MEG3         | 0.66 |
| GJC2                            | 1.9  | MEX3A        | 0.52 |
| GLIS3                           | 1.7  | MFSD2A       | 0.23 |
| GNA14                           | 3.2  | MGC23284     | 0.66 |
| GNAL                            | 2.4  | MGP          | 0.35 |
| GPR146                          | 2.5  | MIR31HG      | 0.66 |
| GPR68                           | 1.7  | MKI67        | 0.18 |
| GPX7                            | 2.0  | MLF1IP       | 0.45 |
| GREM1                           | 2.7  | MMP15        | 0.51 |
| GULP1                           | 1.8  | MMP16        | 0.58 |
| GZMA                            | 1.7  | MRAS         | 0.52 |
| H1FO                            | 1.9  | MREG,PECR    | 0.58 |
| H1FX                            | 1.5  | MXRA8        | 0.59 |
| HAVCR2                          | 2.6  | MYBL2        | 0.13 |
| HELB                            | 1.6  | MYRIP        | 0.59 |
| HERC5                           | 2.1  | NCAPG        | 0.30 |
| HHIPL1                          | 2.0  | NDC80        | 0.22 |
| HIF3A                           | 11.1 | NEU3         | 0.65 |
| HILPDA                          | 1.8  | NID2         | 0.27 |

|             |     |          |      |
|-------------|-----|----------|------|
| HIST1H2BD   | 1.5 | NLGN1    | 0.34 |
| HIST2H2BE   | 1.7 | NOVA1    | 0.56 |
| HK2         | 2.0 | NPM3     | 0.58 |
| HLA-A       | 1.8 | NRGN     | 0.66 |
| HOXD1       | 1.8 | NUF2     | 0.27 |
| HOXD-AS1    | 1.5 | NUSAP1   | 0.45 |
| HRH1        | 1.6 | OR5B17   | 0.63 |
| HSD17B2     | 1.6 | ORC6     | 0.46 |
| HSPA12B     | 2.8 | OSBP2    | 0.59 |
| HTR1B       | 1.8 | OTUB2    | 0.62 |
| HVCN1       | 2.0 | PANK1    | 0.63 |
| HYAL4       | 3.8 | PARD6G   | 0.39 |
| ICAM4       | 2.9 | PARPBP   | 0.59 |
| ICAM5       | 2.2 | PASK     | 0.62 |
| IFITM1      | 1.8 | PDXP     | 0.64 |
| IFITM10     | 1.9 | PFN2     | 0.61 |
| IGFBP5      | 7.0 | PHEX     | 0.60 |
| IL18R1      | 1.6 | PIGZ     | 0.53 |
| IL1R1       | 1.8 | PIK3R3   | 0.45 |
| IL1RAP      | 2.1 | PKMYT1   | 0.23 |
| IL2RG       | 1.5 | PLA2G4A  | 0.54 |
| IL4I1,NUP62 | 1.5 | PLXNA4   | 0.37 |
| IL6         | 2.0 | PMCH     | 0.37 |
| INHBA       | 2.1 | PODXL2   | 0.44 |
| IPMK        | 1.5 | POLR3G   | 0.57 |
| IRF7        | 1.6 | POP1     | 0.47 |
| IRS2        | 1.7 | PPARGC1B | 0.63 |
| ISL2        | 1.7 | PPP1R16B | 0.66 |
| ITGB4       | 1.8 | PRDX2    | 0.67 |
| ITGBL1      | 2.3 | PRR7     | 0.30 |
| JDP2        | 2.0 | PRRT3    | 0.54 |
| JPH2        | 2.5 | PRRX1    | 0.29 |
| KANK3       | 1.6 | PRSS3    | 0.62 |
| KCNJ2       | 1.8 | PSRC1    | 0.51 |
| KCNS3       | 4.2 | PTGDS    | 0.49 |
| KCTD16      | 4.9 | PTP4A3   | 0.40 |
| KCTD8       | 4.1 | PTPRS    | 0.37 |
| KDM3A       | 1.9 | PTTG3P   | 0.58 |
| KLF11       | 1.6 | PVRL1    | 0.67 |
| KLF4        | 3.5 | PXMP2    | 0.54 |
| KLHL3,MYOT  | 1.7 | QPCTL    | 0.62 |
| L3MBTL4     | 1.9 | RAB3A    | 0.61 |
| LAG3        | 1.9 | RAB6B    | 0.29 |

|                                                      |     |              |      |
|------------------------------------------------------|-----|--------------|------|
| LDHA                                                 | 2.2 | RAC3         | 0.57 |
| LIMCH1                                               | 4.7 | RACGAP1      | 0.58 |
| LIMS3,LIMS3-<br>LOC440895,LOC100288570,L<br>OC440895 | 1.8 | RAD51        | 0.63 |
| LINC00263                                            | 1.8 | RAD51AP1     | 0.37 |
| LINC00324                                            | 3.0 | RCAN2        | 0.32 |
| LITAF                                                | 2.4 | RECQL4       | 0.52 |
| LOC100127983                                         | 1.9 | REEP6        | 0.66 |
| LOC100128071                                         | 1.8 | RFC3         | 0.57 |
| LOC100129726                                         | 2.0 | RGS10        | 0.61 |
| LOC100132077                                         | 2.9 | RGS11        | 0.43 |
| LOC100132891                                         | 2.0 | RGS4         | 0.42 |
| LOC100133445,LOC115110                               | 1.8 | RGS5         | 0.15 |
| LOC100134259                                         | 2.5 | RHOBTB3      | 0.63 |
| LOC100190938                                         | 2.6 | RHPN1        | 0.63 |
| LOC100506178                                         | 1.7 | RPS6KL1      | 0.58 |
| LOC100506746                                         | 1.9 | RRM2         | 0.11 |
| LOC100507050                                         | 1.9 | SCAMP5       | 0.43 |
| LOC149837                                            | 2.6 | SCARB1       | 0.56 |
| LOC154761                                            | 2.6 | SCN5A        | 0.52 |
| LOC283104                                            | 1.6 | SDC1         | 0.37 |
| LOC284454,MIR23A,MIR24-<br>2,MIR27A                  | 1.7 | SDSL         | 0.60 |
| LOC439949                                            | 1.8 | SFMBT1       | 0.55 |
| LOC440028                                            | 3.0 | SFXN2        | 0.50 |
| LOX                                                  | 2.0 | SH3PXD2A     | 0.57 |
| LOXL2                                                | 1.5 | SH3TC2       | 0.49 |
| LRG1                                                 | 1.6 | SHANK1       | 0.46 |
| LRP2BP                                               | 1.7 | SHMT1, TOP3A | 0.49 |
| LRRC34                                               | 1.8 | SKA1         | 0.24 |
| LRRC49                                               | 1.6 | SLAIN1       | 0.64 |
| LRRC56                                               | 1.5 | SLC12A2      | 0.61 |
| LURAP1L                                              | 1.6 | SLC25A10     | 0.51 |
| LYPD1                                                | 2.0 | SLC25A19     | 0.65 |
| LYPD5                                                | 2.1 | SLC25A23     | 0.55 |
| MAF                                                  | 2.2 | SLC25A29     | 0.61 |
| MAFK                                                 | 1.6 | SLC29A4      | 0.63 |
| MAMDC4                                               | 1.8 | SLC2A11      | 0.65 |
| MAP3K8                                               | 1.9 | SLC35G1      | 0.66 |
| MAPK13                                               | 2.2 | SLC40A1      | 0.48 |
| MB21D1                                               | 1.7 | SLC43A2      | 0.64 |
| MCHR1                                                | 3.2 | SLC44A5      | 0.39 |

|                                   |     |          |      |
|-----------------------------------|-----|----------|------|
| MEGF10                            | 1.8 | SLC45A4  | 0.59 |
| MEGF6                             | 1.9 | SLC47A1  | 0.38 |
| MEIS1                             | 2.0 | SNRNP25  | 0.63 |
| MEX3B                             | 1.5 | SPAG5    | 0.48 |
| MGC16121,MIR424,MIR503,<br>MIR542 | 3.1 | SPSB2    | 0.65 |
| MIR101-1,MIR3671                  | 2.3 | SSBP3    | 0.60 |
| MIR146A                           | 1.7 | STEAP1B  | 0.59 |
| MIR181A1,MIR181B1                 | 2.4 | SULT1B1  | 0.41 |
| MIR210HG                          | 7.9 | TDRKH    | 0.63 |
| MIR30B                            | 2.2 | TFRC     | 0.64 |
| MLLT4-AS1                         | 1.8 | TIMP1    | 0.61 |
| MME                               | 2.2 | TK1      | 0.32 |
| MMRN2                             | 1.5 | TMEM106C | 0.55 |
| MOB3B                             | 1.6 | TMEM121  | 0.50 |
| MOXD1                             | 1.6 | TMEM177  | 0.66 |
| MRGPRX3                           | 2.5 | TMEM38A  | 0.56 |
| MSC                               | 2.1 | TMEM38B  | 0.67 |
| MT1F                              | 2.3 | TMEM97   | 0.53 |
| MT1L                              | 1.6 | TNFSF4   | 0.47 |
| MT1M                              | 5.9 | TNFSF9   | 0.52 |
| MUC1                              | 1.9 | TNIK     | 0.43 |
| MXI1                              | 1.9 | TOP2A    | 0.19 |
| MYCN                              | 2.6 | TPX2     | 0.54 |
| MYO15B                            | 2.8 | TRAP1    | 0.65 |
| NALCN                             | 1.6 | TRIML2   | 0.51 |
| NARF                              | 1.5 | TRIP13   | 0.52 |
| NDRG1                             | 1.8 | TROAP    | 0.43 |
| NDUFA4L2                          | 1.6 | TUBA4A   | 0.54 |
| NEURL3                            | 2.0 | TYRO3    | 0.60 |
| NFIL3                             | 1.7 | UBD      | 0.50 |
| NKAPL                             | 1.9 | UBE2C    | 0.44 |
| NKAPP1                            | 1.6 | UBE2T    | 0.49 |
| NLRC3                             | 1.7 | UCHL1    | 0.63 |
| NOD2                              | 1.7 | UCP2     | 0.53 |
| NOV                               | 3.0 | UHRF1    | 0.39 |
| NOX4                              | 1.7 | VPS37D   | 0.53 |
| NPR2                              | 1.5 | VSIG1    | 0.67 |
| NR4A2                             | 1.9 | WDHD1    | 0.61 |
| NTN1                              | 1.9 | WDR62    | 0.44 |
| NTN4                              | 1.6 | ZCWPW2   | 0.62 |
| NUPR1                             | 1.7 | ZNF30    | 0.65 |
| NYNRIN                            | 1.7 | ZNF323   | 0.46 |



|               |      |        |      |
|---------------|------|--------|------|
| OASL          | 1.7  | ZNF485 | 0.60 |
| ODF3B         | 2.6  | ZNF491 | 0.66 |
| OSMR          | 2.4  | ZNF503 | 0.46 |
| OTUD1         | 1.6  | ZWINT  | 0.54 |
| P2RX2         | 2.0  |        |      |
| P4HA1         | 2.0  |        |      |
| PAG1          | 3.2  |        |      |
| PALMD         | 1.6  |        |      |
| PAN3-AS1      | 1.6  |        |      |
| PAPL          | 2.0  |        |      |
| PAPPA2        | 2.3  |        |      |
| PCDH10        | 3.0  |        |      |
| PDE4C         | 15.0 |        |      |
| PDGFRA        | 1.8  |        |      |
| PDGFRL        | 1.7  |        |      |
| PDK1          | 2.0  |        |      |
| PDZD2         | 1.9  |        |      |
| PGM1          | 2.5  |        |      |
| PGM5P2        | 1.6  |        |      |
| PHGDH         | 2.5  |        |      |
| PIK3IP1       | 1.5  |        |      |
| PIM1          | 6.0  |        |      |
| PKP3          | 2.0  |        |      |
| PLA2G16       | 1.5  |        |      |
| PLCH2         | 2.7  |        |      |
| PLIN2         | 1.7  |        |      |
| PLOD2         | 2.0  |        |      |
| PMAIP1        | 1.9  |        |      |
| PMEPA1        | 1.7  |        |      |
| PNMA2         | 1.7  |        |      |
| PODXL         | 1.9  |        |      |
| POF1B         | 2.4  |        |      |
| POMC          | 2.5  |        |      |
| PP7080,SLC9A3 | 1.8  |        |      |
| PPARG         | 6.5  |        |      |
| PPFIA4        | 22.9 |        |      |
| PPP1R13L      | 1.7  |        |      |
| PPP1R3G       | 6.7  |        |      |
| PRDM1         | 1.7  |        |      |
| PRDM8         | 2.4  |        |      |
| PRKCQ         | 2.7  |        |      |
| PRKY          | 2.1  |        |      |
| PROCA1        | 1.9  |        |      |

---

|           |     |
|-----------|-----|
| PROS1     | 1.6 |
| PRPS2     | 1.5 |
| PTER      | 2.0 |
| PTGFR     | 1.6 |
| PTGIR     | 2.2 |
| PTPRB     | 2.0 |
| QPCT      | 2.0 |
| RAB33A    | 2.6 |
| RAB34     | 1.7 |
| RAB38     | 1.8 |
| RALGPS2   | 1.9 |
| RAMP2     | 2.5 |
| RARRES1   | 2.9 |
| RASA4     | 1.5 |
| RASSF4    | 1.8 |
| RBMS3     | 1.5 |
| REPS2     | 2.1 |
| RGAG4     | 1.6 |
| RGNEF     | 1.6 |
| RGS7      | 2.0 |
| RHBDF2    | 1.6 |
| RHEBL1    | 1.7 |
| RIPK4     | 3.8 |
| RLF       | 1.6 |
| RNASEL    | 1.6 |
| RORA      | 1.8 |
| RPS6KA5   | 1.6 |
| RSPH9     | 1.9 |
| RTKN      | 2.5 |
| S100A1    | 1.5 |
| SARM1     | 2.1 |
| SAV1      | 1.6 |
| SCARNA9   | 1.8 |
| SCO2,TYMP | 1.7 |
| SDC4      | 2.1 |
| SDR42E1   | 1.6 |
| SEMA3C    | 1.8 |
| SEMA4B    | 2.4 |
| SEPT4     | 3.2 |
| SERTAD4   | 7.0 |
| SFMBT2    | 1.8 |
| SGCE      | 2.2 |
| SGIP1     | 1.9 |

---

|          |      |
|----------|------|
| SH3D21   | 2.7  |
| SHH      | 4.5  |
| SIPA1L1  | 1.9  |
| SIX1     | 2.7  |
| SIX4     | 1.9  |
| SLC16A3  | 1.9  |
| SLC2A1   | 7.3  |
| SLC2A3   | 2.7  |
| SLC30A1  | 1.5  |
| SLC38A4  | 1.9  |
| SLC39A14 | 1.6  |
| SLC45A1  | 1.7  |
| SLC6A6   | 1.6  |
| SLC6A9   | 2.8  |
| SLC7A2   | 2.0  |
| SLC7A5   | 2.0  |
| SLC8A1   | 2.2  |
| SLC8A3   | 11.3 |
| SLCO4A1  | 2.0  |
| SMAD7    | 3.3  |
| SMS      | 1.5  |
| SNX33    | 1.6  |
| SP4      | 1.5  |
| SPAG4    | 2.1  |
| SPRY1    | 2.0  |
| SSTR2    | 1.7  |
| ST8SIA6  | 5.7  |
| STC2     | 3.2  |
| STMN3    | 1.7  |
| STX1B    | 1.6  |
| SUN2     | 1.6  |
| SYNPO    | 1.8  |
| TCHH     | 2.3  |
| TCTEX1D1 | 4.0  |
| TESK2    | 1.7  |
| TGFB2    | 2.4  |
| TGFBI    | 2.3  |
| TIMP3    | 3.0  |
| TIMP4    | 25.9 |
| TLE4     | 1.6  |
| TLR2     | 1.9  |
| TM4SF18  | 1.5  |
| TMEM173  | 1.7  |

---

|           |     |
|-----------|-----|
| TMEM45A   | 2.4 |
| TMEM53    | 1.5 |
| TMEM71    | 2.4 |
| TMIE      | 2.0 |
| TNFAIP3   | 1.8 |
| TNFAIP6   | 1.7 |
| TNFRSF10B | 1.6 |
| TNFRSF10D | 1.7 |
| TNFRSF11A | 1.7 |
| TNFRSF4   | 1.5 |
| TOX       | 2.3 |
| TP63      | 1.9 |
| TPI1      | 2.0 |
| TPM1      | 2.1 |
| TSPAN2    | 3.5 |
| TSPY26P   | 1.7 |
| TTC30A    | 1.7 |
| TTC30B    | 1.8 |
| TUSC1     | 2.0 |
| TUSC3     | 1.5 |
| TXNIP     | 3.9 |
| UBXN11    | 1.6 |
| ULBP1     | 3.4 |
| UNC13A    | 1.9 |
| VAT1L     | 7.1 |
| VCAN      | 3.2 |
| VEGFA     | 3.5 |
| VEGFC     | 1.8 |
| VIP       | 1.6 |
| VLDLR     | 3.4 |
| WDR66     | 2.4 |
| WNK4      | 1.9 |
| WNT5A     | 1.6 |
| XRCC6BP1  | 1.5 |
| ZNF292    | 1.6 |
| ZNF395    | 2.2 |
| ZNF469    | 1.7 |
| ZNF501    | 1.7 |
| ZNF532    | 1.5 |
| ZNF572    | 1.6 |
| ZNF655    | 2.4 |
| ZNF704    | 2.2 |
| ZNF747    | 2.2 |

---

The relative gene expression was compared with the gene expression of hMVECs precultured in normoxia and stimulated with VEGF-A/TNF- $\alpha$  (n=4).
