# Supplementary material for: Identification of HIF-2α-regulated genes that play a role in human microvascular endothelial sprouting during prolonged hypoxia in vitro
Source: PubMed Central journal article supplement (PMC5306362; doi:10.1007/s10456-016-9527-4), 2016-10-03
Supplement: 10456_2016_9527_MOESM4_ESM.pdf [file 10456_2016_9527_MOESM4_ESM.pdf]

**Supplementary Table 4. All genes with significantly induced or repressed gene expression upon HIF-2 $\alpha$  knock-down in prolonged hypoxic precultured hMVECs after VEGF-A/TNF- $\alpha$  stimulation.**

| Upregulated by si-HIF-2 $\alpha$ |             | Downregulated by si-HIF-2 $\alpha$ |             |
|----------------------------------|-------------|------------------------------------|-------------|
| Gene                             | Fold Change | Gene                               | Fold Change |
| AATF                             | 1.5         | AASDH                              | 0.60        |
| ABHD5                            | 1.5         | ABCF1                              | 0.57        |
| ACSS1                            | 1.6         | ABHD14B                            | 0.66        |
| ACTL10                           | 1.6         | ACBD6                              | 0.65        |
| ADAP1                            | 2.2         | ACER2                              | 0.65        |
| ADCY7                            | 1.6         | ACOX1                              | 0.64        |
| ADM2                             | 1.5         | ACP6                               | 0.63        |
| ADO                              | 1.5         | ACSL3                              | 0.55        |
| AGPAT2                           | 1.6         | ACTR5                              | 0.65        |
| AIMP2                            | 1.9         | ADH5                               | 0.61        |
| ALKBH4                           | 1.6         | AGL                                | 0.57        |
| AOX1,SPATS2L                     | 2.4         | AGTPBP1                            | 0.61        |
| AP5B1                            | 1.9         | AIG1                               | 0.53        |
| APC2,C19orf25                    | 1.9         | AK3                                | 0.50        |
| ARF6                             | 1.5         | AKAP9                              | 0.57        |
| ARHGAP8,PRR5,PRR5-ARHGAP8        | 2.9         | AKD1                               | 0.60        |
| ARHGEF2                          | 1.7         | AKR7A2,AKR7A3                      | 0.63        |
| ARL16                            | 1.6         | ALDH18A1                           | 0.64        |
| ASB7                             | 1.7         | ALS2CR8                            | 0.52        |
| ATF5,MIR4751                     | 2.4         | AMACR,C1QTNF3,C1QTNF3-AMACR        | 0.61        |
| ATP1A1OS                         | 1.6         | AMN1                               | 0.62        |
| ATXN7                            | 1.6         | AMT,NICN1                          | 0.66        |
| ATXN7L2                          | 1.5         | AMY2B,RNPC3                        | 0.64        |
| AXIN1                            | 1.7         | AMZ2                               | 0.57        |
| BAG1                             | 1.7         | ANKH                               | 0.67        |
| BAG3                             | 1.9         | ANKRA2                             | 0.67        |
| BAK1                             | 1.8         | ANKRD33B                           | 0.62        |
| BCOR                             | 1.8         | ANKRD55                            | 0.55        |
| BOP1                             | 1.7         | ANO6                               | 0.53        |
| BRAF                             | 1.6         | ANP32E                             | 0.57        |
| BRIX1                            | 1.6         | ANXA2P2                            | 0.62        |
| BRPF1                            | 1.7         | ANXA3                              | 0.67        |
| C11orf61                         | 1.6         | ANXA7                              | 0.63        |
| C11orf84                         | 1.5         | AP2B1                              | 0.65        |
| C15orf39                         | 1.8         | AP3S1                              | 0.62        |

|                   |     |                         |      |
|-------------------|-----|-------------------------|------|
| C16orf5           | 1.5 | APBA1                   | 0.62 |
| C16orf59          | 1.5 | APH1B                   | 0.55 |
| C19orf26          | 1.8 | APLP2                   | 0.65 |
| C19orf66          | 2.1 | ARAP1,STARD10           | 0.60 |
| C1orf109          | 1.5 | ARG2                    | 0.59 |
| C1orf182          | 1.8 | ARL1                    | 0.64 |
| C1orf51           | 1.6 | ARL2BP                  | 0.57 |
| C1orf52           | 1.6 | ARL3                    | 0.64 |
| C1QBP             | 1.6 | ARL6,EPHA6              | 0.58 |
| C2orf55           | 1.7 | ARL6IP5                 | 0.59 |
| C3orf15           | 1.5 | ARMC2                   | 0.58 |
| C3orf38           | 1.7 | ARMCX4                  | 0.63 |
| C3orf55           | 1.5 | ARNT                    | 0.62 |
| C4orf43           | 1.5 | ARPC5                   | 0.56 |
| C5orf25           | 1.7 | ARPP19                  | 0.65 |
| C5orf34           | 1.9 | ARRDC3                  | 0.40 |
| C6orf141          | 2.5 | ARSG                    | 0.59 |
| C6orf47           | 1.5 | ASB8                    | 0.62 |
| C7orf26           | 1.6 | ATF2,CHN1               | 0.66 |
| C7orf43,MIR4658   | 1.5 | ATG10                   | 0.57 |
| C7orf46           | 1.6 | ATG4A                   | 0.59 |
| C8orf33           | 1.7 | ATG7                    | 0.66 |
| C9orf91           | 1.7 | ATP11A                  | 0.64 |
| CACNG8,MIR935     | 1.6 | ATP1B1                  | 0.64 |
| CAMK1D,LOC283070  | 2.1 | ATP5C1                  | 0.66 |
| CAMSAP1           | 1.7 | ATP5E,SLMO2,SLMO2-ATP5E | 0.65 |
| CBR3              | 2.2 | ATP8B3                  | 0.64 |
| CCDC59            | 1.6 | ATPBD4                  | 0.66 |
| CCDC9,PRR24,C5AR1 | 1.8 | ATRX                    | 0.51 |
| CDC25B            | 2.0 | B4GALT6                 | 0.66 |
| CDC34             | 1.7 | BAZ2B                   | 0.52 |
| CDCA3             | 1.7 | BCLAF1                  | 0.67 |
| CDKN2A            | 2.4 | BEND5                   | 0.59 |
| CDKN2AIP          | 1.5 | BFSP1                   | 0.60 |
| CDKN3             | 1.9 | BIK                     | 0.56 |
| CDT1              | 2.4 | BIVM,BIVM-ERCC5,ERCC5   | 0.61 |
| CEACAM19          | 1.7 | BNIP3L                  | 0.52 |
| CEBPB             | 2.3 | BPNT1                   | 0.62 |
| CENPN             | 1.8 | BTBD8,KIAA1107          | 0.59 |
| CEP192,SEH1L      | 2.0 | C10orf108               | 0.63 |
| CERS6             | 1.6 | C11orf51                | 0.64 |
| CGRRF1            | 1.5 | C11orf82                | 0.58 |

|                       |     |                      |      |
|-----------------------|-----|----------------------|------|
| CIB2                  | 1.7 | C14orf101            | 0.67 |
| CIDECF                | 1.5 | C14orf135            | 0.67 |
| CLASRP                | 1.6 | C14orf45             | 0.57 |
| CLCN2                 | 1.5 | C15orf62             | 0.66 |
| CMC2                  | 1.6 | C16orf62             | 0.66 |
| CPEB3                 | 1.6 | C1orf63              | 0.66 |
| CRIP1                 | 2.5 | C20orf3              | 0.31 |
| CRTC2                 | 1.5 | C2orf27A,POTEKP      | 0.55 |
| DEM1                  | 1.6 | C2orf74,KIAA1841     | 0.58 |
| DENND1A               | 1.9 | C3orf64,TMF1         | 0.61 |
| DENND4B               | 1.5 | C4orf27              | 0.62 |
| DERL3                 | 1.9 | C5orf24,DDX46        | 0.66 |
| DGCR8,MIR1306,MIR3618 | 1.6 | C5orf54              | 0.53 |
| DKC1,SNORA56          | 1.7 | C5orf63              | 0.64 |
| DKFZP586I1420,ZNRF2   | 1.8 | C6orf170             | 0.66 |
| DLG5                  | 1.5 | C6orf70              | 0.63 |
| DND1                  | 1.5 | C6orf72              | 0.61 |
| DOCK2                 | 1.8 | C7orf10              | 0.49 |
| DPH2                  | 1.6 | C9orf125             | 0.61 |
| DPY19L3               | 1.5 | C9orf80              | 0.58 |
| DRAP1                 | 1.9 | CA12                 | 0.45 |
| DUSP1                 | 2.0 | CACNA1C              | 0.52 |
| EAF2                  | 1.7 | CACNB3               | 0.66 |
| ECHDC3                | 2.1 | CALD1                | 0.60 |
| EFCAB2                | 1.5 | CAMK4                | 0.49 |
| EIF2C3                | 1.5 | CASC4,CTDSPL2        | 0.67 |
| ELF4                  | 2.0 | CASD1                | 0.58 |
| EMP1                  | 1.6 | CASP6,PLA2G12A       | 0.60 |
| EPM2A                 | 1.6 | CBR4                 | 0.50 |
| EPS8                  | 1.5 | CCBL1                | 0.60 |
| ERF                   | 1.9 | CCDC102B             | 0.65 |
| ETS2                  | 1.6 | CCDC110              | 0.58 |
| EVC2                  | 1.6 | CCDC125              | 0.62 |
| EXOSC9                | 2.0 | CCDC13               | 0.64 |
| FAM110A               | 1.8 | CCDC134,SREBF2       | 0.53 |
| FAM167A               | 1.7 | CCDC23               | 0.64 |
| FAM46A                | 1.5 | CCDC85A              | 0.61 |
| FAM86C2P              | 1.8 | CCDC88A              | 0.65 |
| FANCM                 | 1.6 | CCL28                | 0.57 |
| FARP2                 | 1.7 | CCND2                | 0.60 |
| FBRSL1                | 1.5 | CCNG1                | 0.65 |
| FBXL14                | 1.7 | CCNG2                | 0.58 |
| FBXO27                | 1.6 | CCPG1,DYX1C1,DYX1C1- | 0.55 |

|                    |     |                             |      |
|--------------------|-----|-----------------------------|------|
|                    |     | CCPG1                       |      |
| FBXO6              | 2.3 | CD200                       | 0.54 |
| FJX1               | 1.9 | CD55                        | 0.63 |
| FKBP11             | 1.6 | CD58                        | 0.62 |
| FKBP1B             | 1.9 | CD9                         | 0.56 |
| FKBP5,LOC285847    | 1.9 | CDC123                      | 0.58 |
| FLJ35946           | 1.8 | CDC42                       | 0.54 |
| FLJ41484           | 2.2 | CDH5                        | 0.59 |
| FLNC               | 1.7 | CEMP1                       | 0.66 |
| FOXM1              | 1.9 | CENPBD1                     | 0.60 |
| FOXP4,MIR4641      | 1.6 | CEP19                       | 0.65 |
| FRMD6-AS1          | 1.7 | CEP250                      | 0.61 |
| FRS3               | 1.7 | CEP290                      | 0.64 |
| GATA2              | 1.8 | CEP78                       | 0.58 |
| GATAD2A            | 1.5 | CEPT1                       | 0.66 |
| GBX2               | 1.9 | CETN2                       | 0.52 |
| GDAP1              | 2.0 | CETN3                       | 0.53 |
| GEMIN5             | 1.6 | CHCHD1                      | 0.66 |
| GLIS2              | 1.8 | CHD2,LOC100507217           | 0.63 |
| GPD2               | 1.8 | CHP                         | 0.61 |
| GPN3               | 1.6 | CHURC1,CHURC1-<br>FNTB,FNTB | 0.66 |
| GPR39              | 1.5 | CLCN3                       | 0.59 |
| GPR89B,GPR89C      | 2.0 | CMTM6                       | 0.55 |
| GPRIN1             | 2.0 | CNN3                        | 0.58 |
| GRK6               | 1.6 | CNOT6                       | 0.65 |
| GTF2F1             | 1.7 | CNST,SCCPDH                 | 0.62 |
| GTPBP1             | 1.6 | CNTROB                      | 0.63 |
| HCP5               | 2.3 | COG6                        | 0.59 |
| HES4               | 3.3 | COL4A3BP                    | 0.64 |
| HIRA               | 1.7 | COL5A1                      | 0.66 |
| HIST1H1C           | 1.9 | COLEC10                     | 0.51 |
| HIST1H2AI,HIST1H3H | 2.1 | COMMD6                      | 0.62 |
| HIST2H2BA          | 3.5 | COX18                       | 0.62 |
| HMGA1              | 1.9 | COX6C                       | 0.62 |
| HMHA1              | 1.9 | CPD                         | 0.53 |
| HOXD4,MIR10B       | 1.8 | CPOX                        | 0.56 |
| HOXD-AS2           | 2.7 | CRBN                        | 0.57 |
| HPSE               | 2.1 | CREBL2                      | 0.59 |
| HSBP1L1            | 1.6 | CRIPAK,KIAA1530             | 0.66 |
| HSPA14             | 1.5 | CSGALNACT1                  | 0.65 |
| HSPA2              | 1.9 | CTC1                        | 0.66 |
| ICAM4              | 2.5 | CTSO                        | 0.45 |

|                      |     |                                      |      |
|----------------------|-----|--------------------------------------|------|
| IDH3A                | 1.6 | CYP27C1                              | 0.66 |
| IER2                 | 1.9 | DAB2                                 | 0.63 |
| IER5L                | 2.1 | DAZAP2                               | 0.65 |
| IFITM3               | 1.6 | DCBLD2                               | 0.61 |
| IFNE,MIR31HG         | 1.8 | DDX17                                | 0.61 |
| IFRD1                | 1.6 | DDX6                                 | 0.64 |
| IL6                  | 1.9 | DEGS1                                | 0.55 |
| IMP4                 | 1.8 | DHFRL1                               | 0.63 |
| IRF2BP1              | 2.0 | DHRS4,DHRS4L2                        | 0.65 |
| IRF2BP2              | 1.6 | DIXDC1                               | 0.62 |
| IRF2BPL              | 1.8 | DKFZP564C196                         | 0.67 |
| IRS2                 | 1.8 | DLD                                  | 0.65 |
| ISL2                 | 2.3 | DMD                                  | 0.63 |
| ISOC2                | 1.9 | DNAJC25,DNAJC25-<br>GNG10,GNG10,UGCG | 0.60 |
| ITPK1                | 1.9 | DNAJC3                               | 0.63 |
| ITPR3                | 1.5 | DNAJC7                               | 0.66 |
| ITPRIP               | 1.7 | DNASE1L1,RPL10                       | 0.56 |
| ITPRIPL1             | 1.6 | DOCK4                                | 0.65 |
| KBTBD8               | 1.8 | DPY30,MEMO1                          | 0.66 |
| KCNS3                | 2.0 | DPYD                                 | 0.60 |
| KDM6B,TMEM88         | 1.6 | DSEL                                 | 0.61 |
| KHDRBS3              | 1.5 | DSTN                                 | 0.60 |
| KIAA0182             | 2.0 | DSTNP2,RPL13P5                       | 0.64 |
| KIAA0226,MIR922      | 1.9 | DSTYK                                | 0.63 |
| KLF11                | 1.6 | DTNA                                 | 0.57 |
| KLF2                 | 1.8 | DUSP18                               | 0.61 |
| KLHL21               | 1.7 | DUSP19                               | 0.64 |
| KTN1-AS1             | 1.7 | DUSP3                                | 0.66 |
| LAG3                 | 1.7 | DYNC1I2                              | 0.61 |
| LIAS                 | 1.5 | DYNC1LI2                             | 0.66 |
| LIMA1                | 1.6 | DYNLT3                               | 0.58 |
| LMCD1                | 2.1 | EBLN2                                | 0.57 |
| LMO4                 | 2.0 | EEF2K                                | 0.58 |
| LOC100128881         | 2.1 | EFCAB11                              | 0.63 |
| LOC100129138         | 1.6 | EFNB3                                | 0.62 |
| LOC100129387,MIR4712 | 1.6 | EHD2                                 | 0.60 |
| LOC100131089         | 1.7 | ELN                                  | 0.62 |
| LOC100132247         | 1.6 | EMCN                                 | 0.51 |
| LOC100132356         | 1.7 | ENO3                                 | 0.63 |
| LOC100132774         | 1.9 | ENSA                                 | 0.67 |
| LOC100134713         | 1.6 | ENTPD4                               | 0.61 |
| LOC100286793         | 2.1 | EPAS1                                | 0.15 |

|                       |     |                                 |      |
|-----------------------|-----|---------------------------------|------|
| LOC100288974,MBL1P    | 1.6 | EPB41                           | 0.64 |
| LOC100505894          | 1.6 | EPB41L1                         | 0.57 |
| LOC100506054          | 1.7 | EPM2AIP1                        | 0.60 |
| LOC100506178          | 1.6 | ERLEC1                          | 0.67 |
| LOC100506451          | 1.5 | EXOC6                           | 0.63 |
| LOC100507392          | 2.1 | EXTL3                           | 0.57 |
| LOC100507463          | 1.7 | F2R                             | 0.64 |
| LOC282997             | 1.9 | FADS1                           | 0.44 |
| LOC401010             | 1.5 | FAM102B                         | 0.64 |
| LOC439949             | 1.6 | FAM115C                         | 0.52 |
| LOC613037             | 1.7 | FAM120B                         | 0.65 |
| LOC642846             | 1.9 | FAM134C                         | 0.67 |
| LOC84856              | 1.8 | FAM13A-AS1                      | 0.64 |
| LPIN1                 | 1.6 | FAM160A1                        | 0.58 |
| LRCH4,SAP25           | 1.5 | FAM171B                         | 0.58 |
| LRR1                  | 1.5 | FAM185A,FBXL13                  | 0.67 |
| LRRC34                | 1.5 | FAM189A2                        | 0.60 |
| LRRC37A3              | 2.0 | FAM20C                          | 0.65 |
| LRRC56                | 1.9 | FAM45A,FAM45B                   | 0.62 |
| LRRK1                 | 1.6 | FAM45B                          | 0.67 |
| LYSMD2                | 1.8 | FAM63B                          | 0.67 |
| MAD1L1                | 1.5 | FAM69B                          | 0.66 |
| MAMLD1                | 1.5 | FBXO9                           | 0.66 |
| MAPKAPK5              | 1.6 | FDFT1                           | 0.64 |
| MARS2                 | 1.6 | FECH                            | 0.65 |
| MCM5                  | 1.5 | FER1L4                          | 0.60 |
| MDK                   | 1.9 | FKBP1A,FKBP1A-<br>SDCBP2,SDCBP2 | 0.67 |
| MERTK                 | 1.7 | FKBP7                           | 0.62 |
| METTL1                | 1.7 | FLJ41200                        | 0.57 |
| METTL11A              | 1.6 | FLJ42351                        | 0.65 |
| METTL12               | 1.5 | FLJ46906                        | 0.65 |
| MFSD9                 | 1.6 | FLNB                            | 0.58 |
| MICB                  | 1.6 | FLOT2                           | 0.66 |
| MIP                   | 1.6 | FNIP1                           | 0.66 |
| MIR1292,NOP56,SNORD86 | 2.2 | FPGT,FPGT-<br>TNNI3K,TNNI3K     | 0.60 |
| MIR31HG               | 2.2 | FRG1B                           | 0.63 |
| MIR3614,TRIM25        | 1.6 | FRMD6                           | 0.58 |
| MIR4667,TESK1         | 1.7 | FTH1P3                          | 0.51 |
| MLKL                  | 1.6 | FTO                             | 0.64 |
| MLL2                  | 1.6 | FUT10                           | 0.56 |
| MMP17                 | 1.8 | G3BP1                           | 0.56 |

|               |     |           |      |
|---------------|-----|-----------|------|
| MOV10         | 1.6 | GALC      | 0.51 |
| MRM1          | 1.5 | GALNT1    | 0.62 |
| MSTO2P        | 1.6 | GAS2      | 0.59 |
| MT1E          | 1.7 | GAS2L3    | 0.63 |
| MYC           | 2.0 | GBE1      | 0.64 |
| MYD88         | 1.6 | GCHFR     | 0.64 |
| MYEOV         | 2.5 | GDF11     | 0.65 |
| NANOS3        | 1.9 | GEMIN8    | 0.64 |
| NBR2          | 1.7 | GIN1      | 0.64 |
| NCDN          | 1.6 | GIPC3     | 0.60 |
| NCK2          | 1.6 | GK        | 0.60 |
| NCOA2         | 1.6 | GK3P      | 0.59 |
| NCOR2         | 1.6 | GLCE      | 0.54 |
| NDOR1         | 1.6 | GLOD4     | 0.67 |
| NEK8,TRAF4    | 2.4 | GMCL1     | 0.61 |
| NEURL3        | 2.6 | GMCL1P1   | 0.47 |
| NFATC3        | 1.5 | GNA12     | 0.65 |
| NOC3L         | 1.6 | GNG11     | 0.61 |
| NOLC1,PPRC1   | 1.8 | GNPAT     | 0.64 |
| NOP16         | 1.8 | GNPDA1    | 0.55 |
| NOTCH1        | 1.5 | GNRH1     | 0.58 |
| NPHP4         | 1.5 | GNS       | 0.62 |
| NPIP          | 1.8 | GOLGA2    | 0.67 |
| NPIPL3        | 1.7 | GOLIM4    | 0.62 |
| NR4A1         | 2.1 | GON4L     | 0.66 |
| NSUN2         | 1.7 | GPBP1L1   | 0.60 |
| NSUN5,NSUN5P2 | 2.2 | GPC1      | 0.61 |
| NSUN6         | 1.6 | GPR160    | 0.60 |
| NUDT9P1       | 2.1 | GRAMD3    | 0.55 |
| NUP153        | 1.6 | GSK3B     | 0.61 |
| NUP160        | 1.6 | H2AFV     | 0.62 |
| NUP98         | 1.7 | HACE1     | 0.60 |
| NUPL2         | 1.5 | HADHA     | 0.61 |
| NXT1          | 1.5 | HADHB     | 0.61 |
| ORAOV1        | 1.8 | HBP1      | 0.63 |
| OSGIN1        | 1.9 | HCG11     | 0.64 |
| PACSIN3       | 1.7 | HERC1     | 0.66 |
| PAPD4         | 1.6 | HIBADH    | 0.67 |
| PARP10        | 1.6 | HMG20A    | 0.57 |
| PARP8         | 4.1 | HMOX2     | 0.65 |
| PDE4DIP       | 2.0 | HNRNPA2B1 | 0.66 |
| PDRG1         | 1.5 | HNRNPM    | 0.63 |
| PDXP          | 1.6 | HSD17B11  | 0.57 |

|             |     |                                                                |      |
|-------------|-----|----------------------------------------------------------------|------|
| PEMT        | 2.0 | HSDL2                                                          | 0.60 |
| PHACTR4     | 1.8 | HTATIP2                                                        | 0.63 |
| PHF15       | 1.7 | HTRA3                                                          | 0.59 |
| PHF19,TRAF1 | 2.9 | HYAL3,NAT6                                                     | 0.63 |
| PHLDA2      | 1.6 | IFNAR1                                                         | 0.60 |
| PLD6        | 1.6 | IFNAR2,IL10RB                                                  | 0.58 |
| PLEKHF1     | 2.2 | IFNGR1                                                         | 0.65 |
| PLEKHG3     | 1.6 | IFT27                                                          | 0.63 |
| PLEKHO2     | 1.9 | IFT80                                                          | 0.63 |
| PLXNA4      | 1.7 | IFT81                                                          | 0.54 |
| PNO1        | 1.8 | IK,MIR3655                                                     | 0.62 |
| POLR3C      | 1.9 | IL13RA1                                                        | 0.65 |
| POLR3K      | 1.6 | IL1A                                                           | 0.67 |
| PPCDC       | 1.6 | IL27RA                                                         | 0.63 |
| PPIF        | 1.5 | IL6ST                                                          | 0.58 |
| PPM1J       | 1.9 | IMPACT                                                         | 0.60 |
| PPP3CC      | 1.7 | IMPAD1                                                         | 0.60 |
| PRICKLE3    | 1.5 | INTS2                                                          | 0.64 |
| PRKCD       | 1.6 | IPP                                                            | 0.59 |
| PRKD2       | 1.6 | IPW,SNORD116-17,SNORD116-21,SNORD116-24,SNORD116-26,SNORD116-4 | 0.60 |
| PRPF4       | 1.6 | IQCC                                                           | 0.66 |
| PRR3        | 1.6 | IQCK                                                           | 0.64 |
| PRRX1       | 1.6 | IQGAP1                                                         | 0.51 |
| PTHLH       | 2.1 | ISCU                                                           | 0.60 |
| PTK2B       | 2.1 | ISOC1                                                          | 0.67 |
| PTP4A3      | 2.7 | ITGA11                                                         | 0.65 |
| PTTG1       | 1.6 | ITGA6                                                          | 0.59 |
| PUS1        | 1.8 | ITGB1                                                          | 0.60 |
| PWWP2B      | 1.7 | ITPR2                                                          | 0.56 |
| RASD1       | 1.9 | JRKL                                                           | 0.67 |
| RASGRF1     | 2.0 | KATNAL1                                                        | 0.66 |
| RASL10A     | 1.7 | KBTBD3                                                         | 0.55 |
| RGMB        | 1.5 | KBTBD6                                                         | 0.59 |
| RILPL1      | 1.7 | KCNAB1                                                         | 0.54 |
| RP9,RP9P    | 1.8 | KDELR2                                                         | 0.60 |
| RPA4        | 1.7 | KIAA0196                                                       | 0.67 |
| RPL39L      | 1.7 | KIAA0232                                                       | 0.60 |
| RPL9        | 1.6 | KIAA0317                                                       | 0.65 |
| RPS6KB2     | 1.6 | KIAA0895                                                       | 0.62 |



|          |     |                              |      |
|----------|-----|------------------------------|------|
| RPUSD1   | 1.6 | KIAA1211                     | 0.51 |
| RRP1     | 1.8 | KIAA1324                     | 0.58 |
| RRP12    | 1.8 | KIAA1377                     | 0.54 |
| RRP9     | 2.1 | KIAA1407                     | 0.60 |
| RRS1     | 1.6 | KIAA1462                     | 0.66 |
| RTKN     | 2.1 | KIAA1797                     | 0.60 |
| RUSC1    | 1.5 | KIFAP3                       | 0.61 |
| S100A2   | 1.8 | KISS1                        | 0.41 |
| SART1    | 1.5 | KLHL12                       | 0.67 |
| SASH1    | 1.7 | KLHL24                       | 0.50 |
| SBDSP1   | 1.6 | KRT19,KRT33A                 | 0.60 |
| SCAF4    | 1.5 | KRT80                        | 0.60 |
| SCO1     | 1.5 | LAMP2                        | 0.59 |
| SDHAP1   | 1.6 | LCORL                        | 0.64 |
| SDSL     | 1.9 | LDLRAP1                      | 0.65 |
| SERPINB2 | 1.8 | LEPR,LEPROT                  | 0.54 |
| SESN3    | 1.8 | LEPREL1                      | 0.57 |
| SF1      | 1.8 | LEPROTL1                     | 0.53 |
| SFXN4    | 1.6 | LINC00085,MIR125A            | 0.66 |
| SGTA     | 1.6 | LIX1L                        | 0.56 |
| SIAH2    | 1.6 | LOC100130890                 | 0.56 |
| SIK1     | 1.6 | LOC100131094                 | 0.66 |
| SLC20A2  | 1.6 | LOC100499466                 | 0.61 |
| SLC25A33 | 1.8 | LOC100505495                 | 0.64 |
| SLC43A1  | 1.6 | LOC100505648                 | 0.63 |
| SLC7A5   | 1.7 | LOC100505678                 | 0.63 |
| SNAPC1   | 1.6 | LOC100505761                 | 0.51 |
| SNAPC4   | 1.5 | LOC100506746                 | 0.62 |
| SNHG8    | 1.7 | LOC221442,NFYA,APOBEC<br>2   | 0.62 |
| SNORD7   | 1.8 | LOC254100                    | 0.64 |
| SOCS3    | 2.0 | LOC286437,MCART6,MIR12<br>56 | 0.62 |
| SOCS6    | 1.5 | LOC375190                    | 0.66 |
| SOLH     | 2.0 | LOC550643                    | 0.67 |
| SOX18    | 1.6 | LOC642852                    | 0.62 |
| SP140L   | 1.7 | LOC643401                    | 0.48 |
| SPHK1    | 1.5 | LOC646999                    | 0.64 |
| SPOCD1   | 1.7 | LOC728758                    | 0.64 |
| SPRY4    | 1.5 | LOXL2                        | 0.60 |
| SPTBN5   | 1.6 | LPCAT1                       | 0.63 |
| SRD5A1   | 1.6 | LPCAT2                       | 0.60 |
| SRM      | 2.0 | LPXN                         | 0.54 |

|          |     |                |      |
|----------|-----|----------------|------|
| SSBP2    | 1.6 | LRCH3          | 0.65 |
| STARD8   | 1.7 | LRP12          | 0.53 |
| STEAP1   | 1.6 | LRRIQ1         | 0.52 |
| STOML1   | 1.7 | LUST           | 0.58 |
| SUV39H1  | 1.5 | LYPD3          | 0.54 |
| TAP2     | 1.9 | MALAT1         | 0.65 |
| TBC1D30  | 1.6 | MAN1A1         | 0.66 |
| TBKBP1   | 1.9 | MAP3K1         | 0.55 |
| TBP      | 1.5 | MAP7D3         | 0.62 |
| TCF19    | 1.6 | MAPK8IP1       | 0.65 |
| TCOF1    | 1.7 | MAPKBP1        | 0.64 |
| TEX2     | 1.5 | MAPRE3         | 0.66 |
| TFAP4    | 1.6 | MARCH4         | 0.55 |
| TFEB     | 2.0 | MARCH8         | 0.62 |
| THAP4    | 1.6 | MB21D2         | 0.61 |
| TIMM9    | 1.5 | MCU            | 0.62 |
| TLE4     | 1.9 | MCHR1          | 0.11 |
| TMCO4    | 1.8 | ME1            | 0.66 |
| TMEM121  | 1.7 | MED20          | 0.63 |
| TMEM194B | 1.6 | MED7           | 0.58 |
| TMEM201  | 1.5 | MFSD11         | 0.64 |
| TMEM91   | 2.3 | MGC23284       | 0.67 |
| TMIE     | 1.9 | MGST1          | 0.67 |
| TOB1     | 1.5 | MIR331,MIR3685 | 0.48 |
| TOE1     | 1.6 | MIR4444-1      | 0.60 |
| TOMM40   | 1.6 | MIR4469,RNF170 | 0.63 |
| TOP1MT   | 1.5 | MKL2           | 0.62 |
| TRAP1    | 1.7 | MKS1           | 0.62 |
| TRIB1    | 2.0 | MLL5           | 0.64 |
| TRIM11   | 1.9 | MMD            | 0.47 |
| TRIM62   | 1.7 | MME            | 0.47 |
| TRIM68   | 1.6 | MMP14          | 0.67 |
| TUFT1    | 1.6 | MORF4L1        | 0.55 |
| TXLNG    | 1.5 | MOSPD1         | 0.60 |
| TYW1B    | 1.7 | MPP4           | 0.58 |
| UBE2L6   | 1.6 | MPZL1          | 0.36 |
| UFSP1    | 1.8 | MRC1           | 0.65 |
| UHRF2    | 1.5 | MREG,PECR      | 0.59 |
| VTI1A    | 1.6 | MRFAP1L1       | 0.67 |
| WDFY2    | 1.6 | MRGPRX4        | 0.51 |
| WDR3     | 1.6 | MRPS28,TPD52   | 0.67 |
| WDR4     | 1.6 | MRS2           | 0.61 |
| WDR74    | 2.0 | MSL3P1         | 0.52 |

|                |     |            |      |
|----------------|-----|------------|------|
| WDR76          | 1.6 | MSMO1      | 0.62 |
| WDR78          | 1.5 | MTIF3      | 0.57 |
| WTIP           | 1.8 | MXRA7      | 0.57 |
| ZBTB42         | 1.8 | MYH10      | 0.58 |
| ZBTB49         | 1.5 | MYO1B      | 0.65 |
| ZCCHC18        | 1.7 | MYO1D      | 0.55 |
| ZCWPW2         | 1.6 | NACA       | 0.63 |
| ZFP3           | 1.5 | NAP1L1     | 0.55 |
| ZFP36          | 2.2 | NAP1L5     | 0.66 |
| ZFP37          | 2.1 | NBAS       | 0.62 |
| ZNF133         | 1.8 | NBEAL2     | 0.65 |
| ZNF138         | 1.9 | NBPF16     | 0.49 |
| ZNF205         | 1.7 | NCK1       | 0.61 |
| ZNF251         | 1.6 | NDRG3      | 0.53 |
| ZNF275         | 1.6 | NEDD4L     | 0.56 |
| ZNF319         | 1.5 | NFATC2     | 0.65 |
| ZNF324,ZNF324B | 1.8 | NFIB       | 0.46 |
| ZNF469         | 2.0 | NHLRC3     | 0.65 |
| ZNF473         | 1.7 | NIN        | 0.61 |
| ZNF496         | 1.6 | NIPAL2     | 0.60 |
| ZNF517         | 1.5 | NLRC3      | 0.63 |
| ZNF580,ZNF581  | 1.8 | NOVA1      | 0.41 |
| ZNF582         | 1.7 | NPR2       | 0.54 |
| ZNF584         | 1.7 | NUAK1      | 0.65 |
| ZNF597         | 1.6 | NUDT13     | 0.55 |
| ZNF598         | 1.9 | NUDT9      | 0.62 |
| ZNF662         | 1.6 | OAT        | 0.64 |
| ZNF689         | 1.6 | OAZ2       | 0.66 |
| ZNF696         | 1.6 | OCIAD2     | 0.52 |
| ZNF746,ZNF767  | 1.7 | ODZ3       | 0.61 |
| ZNF75A         | 1.5 | OR5B17     | 0.53 |
| ZNF777         | 1.9 | OSBPL8     | 0.63 |
| ZNF778         | 1.5 | OSBPL9     | 0.59 |
| ZNF783         | 1.6 | OSTC,RPL34 | 0.58 |
| ZNF786         | 1.7 | OSTF1      | 0.63 |
| ZNF837         | 1.6 | OXSM       | 0.61 |
| ZRANB3         | 1.6 | P4HA1      | 0.63 |
| ZSCAN22        | 1.5 | PACS2      | 0.59 |
| ZSCAN29        | 1.5 | PCCB       | 0.65 |
|                |     | PCDH10     | 0.64 |
|                |     | PCGF3      | 0.64 |
|                |     | PCMTD2     | 0.59 |
|                |     | PCYOX1     | 0.47 |

|               |      |
|---------------|------|
| PDCL          | 0.56 |
| PDE4D         | 0.66 |
| PDGFC         | 0.67 |
| PDGFD         | 0.56 |
| PDHB          | 0.66 |
| PDLIM3        | 0.65 |
| PEX12         | 0.65 |
| PFDN1         | 0.63 |
| PGM2L1        | 0.67 |
| PHF10         | 0.56 |
| PHF6          | 0.59 |
| PHKB          | 0.59 |
| PHLDB2,PLCXD2 | 0.66 |
| PHTF1         | 0.60 |
| PIAS1         | 0.64 |
| PIGP          | 0.67 |
| PIK3CB        | 0.52 |
| PIN4          | 0.67 |
| PIP5K1C       | 0.66 |
| PJA2          | 0.50 |
| PKI55         | 0.64 |
| PLA2G4A       | 0.62 |
| PLDN          | 0.55 |
| PLEKHA1       | 0.62 |
| PLOD2         | 0.55 |
| PLXNB1        | 0.64 |
| PMEPA1        | 0.59 |
| PMPCB,PSMC2   | 0.62 |
| PNPLA8        | 0.55 |
| PODXL         | 0.53 |
| POPDC3        | 0.49 |
| POU2F1        | 0.63 |
| PPA2          | 0.63 |
| PPARD         | 0.65 |
| PPARG         | 0.49 |
| PPCS          | 0.64 |
| PRICKLE2      | 0.58 |
| PRKAR1A       | 0.66 |
| PRPF39        | 0.65 |
| PRPF4B        | 0.66 |
| PRR5L         | 0.62 |
| PRRC1         | 0.60 |
| PRSS12        | 0.64 |

---

|         |      |
|---------|------|
| PSMB1   | 0.65 |
| PSMD1   | 0.66 |
| PSMD10  | 0.58 |
| PSME1   | 0.67 |
| PSPH    | 0.63 |
| PTCHD4  | 0.60 |
| PTK7    | 0.55 |
| PTPLAD2 | 0.54 |
| PTTG1IP | 0.61 |
| RAB1A   | 0.64 |
| RAB30   | 0.59 |
| RAB3B   | 0.56 |
| RAB3D   | 0.62 |
| RAB40A  | 0.65 |
| RAB42   | 0.64 |
| RAB6A   | 0.62 |
| RAB6B   | 0.61 |
| RABL2B  | 0.64 |
| RAC1    | 0.61 |
| RAI14   | 0.64 |
| RALA    | 0.55 |
| RALGAPB | 0.66 |
| RALGPS2 | 0.50 |
| RASSF9  | 0.37 |
| RBFOX2  | 0.64 |
| RBM4B   | 0.64 |
| RCHY1   | 0.64 |
| RCN1    | 0.61 |
| RDH10   | 0.58 |
| REPS2   | 0.49 |
| REV3L   | 0.61 |
| REXO2   | 0.61 |
| RHOA    | 0.64 |
| RHOQ    | 0.56 |
| RIMS1   | 0.63 |
| RMRP    | 0.57 |
| RNF130  | 0.62 |
| RNF141  | 0.56 |
| RNF207  | 0.58 |
| RPL11   | 0.67 |
| RPL15   | 0.63 |
| RPL23   | 0.66 |
| RPL27A  | 0.67 |

---

|              |      |
|--------------|------|
| RPL5         | 0.64 |
| RPS13        | 0.66 |
| RPS28        | 0.61 |
| RPS8,SNORD55 | 0.65 |
| RRAGB        | 0.65 |
| RYK          | 0.59 |
| SARNP        | 0.65 |
| SATB1        | 0.66 |
| SCD          | 0.63 |
| SCD5         | 0.59 |
| SDC2         | 0.57 |
| SDC3         | 0.60 |
| SDCBP        | 0.62 |
| SDHC         | 0.61 |
| SEC22A       | 0.64 |
| SEC62        | 0.65 |
| SELT         | 0.66 |
| SEPT2        | 0.60 |
| SEPT8        | 0.61 |
| SERINC1      | 0.58 |
| SESN1        | 0.63 |
| SESTD1       | 0.63 |
| SF3B1        | 0.59 |
| SFPQ         | 0.60 |
| SKAP2        | 0.53 |
| SLC25A40     | 0.63 |
| SLC2A11      | 0.59 |
| SLC37A3      | 0.65 |
| SLC38A4      | 0.54 |
| SLC39A10     | 0.46 |
| SLC40A1      | 0.66 |
| SLC44A1      | 0.66 |
| SLC6A15      | 0.61 |
| SMAD1        | 0.66 |
| SMARCC2      | 0.65 |
| SNX13        | 0.60 |
| SNX29        | 0.63 |
| SNX33        | 0.60 |
| SPA17        | 0.60 |
| SPAG16       | 0.57 |
| SPATA18      | 0.62 |
| SPCS1        | 0.58 |
| SPG7         | 0.65 |

---

|               |      |
|---------------|------|
| SPPL3         | 0.64 |
| SREK1IP1      | 0.65 |
| SSR1          | 0.66 |
| ST3GAL6       | 0.63 |
| STARD9        | 0.56 |
| STC1          | 0.63 |
| STK32B        | 0.65 |
| SUCLG1        | 0.66 |
| SUCLG2        | 0.66 |
| SUMO2         | 0.58 |
| SWAP70        | 0.63 |
| SYNGAP1,ZBTB9 | 0.66 |
| SYT9          | 0.60 |
| TACC1         | 0.67 |
| TAF1L         | 0.67 |
| TAF9B         | 0.59 |
| TANC1         | 0.65 |
| TBC1D15       | 0.60 |
| TBC1D5        | 0.60 |
| TBC1D7        | 0.63 |
| TBCA          | 0.56 |
| TBRG1         | 0.65 |
| TCEAL4        | 0.57 |
| TCF4          | 0.65 |
| TCP11L2       | 0.47 |
| TEK           | 0.62 |
| TGFBR2        | 0.60 |
| TGOLN2        | 0.59 |
| TIE1          | 0.64 |
| TIGD2         | 0.61 |
| TIMP4         | 0.45 |
| TM2D2         | 0.66 |
| TM4SF1        | 0.65 |
| TM4SF18       | 0.53 |
| TMBIM6        | 0.59 |
| TMCO3         | 0.62 |
| TMED10        | 0.56 |
| TMEM128       | 0.66 |
| TMEM14A       | 0.52 |
| TMEM14B       | 0.54 |
| TMEM14C       | 0.54 |
| TMEM154       | 0.53 |
| TMEM17        | 0.61 |

---

|               |      |
|---------------|------|
| TMEM184B      | 0.62 |
| TMEM214       | 0.67 |
| TMEM50B       | 0.59 |
| TMEM67        | 0.62 |
| TMEM98        | 0.66 |
| TMTC4         | 0.62 |
| TNFAIP8       | 0.57 |
| TNFRSF10B     | 0.63 |
| TONSL,VPS28   | 0.58 |
| TOP2B,MIR4442 | 0.62 |
| TP53INP2      | 0.50 |
| TPCN2         | 0.66 |
| TRAK1         | 0.63 |
| TRIM16        | 0.58 |
| TRIM24        | 0.63 |
| TRIM37        | 0.61 |
| TRPC1         | 0.59 |
| TSC1          | 0.66 |
| TSPAN13       | 0.65 |
| TSPAN14       | 0.67 |
| TSPAN2        | 0.54 |
| TSPAN3        | 0.66 |
| TSPYL1        | 0.64 |
| TTBK2         | 0.67 |
| TTC1          | 0.63 |
| TTC13         | 0.57 |
| TTC3          | 0.57 |
| TTC3P1        | 0.62 |
| TTC5          | 0.65 |
| TUBB3         | 0.62 |
| TXLNB         | 0.67 |
| TXNDC15       | 0.56 |
| TXNDC16       | 0.59 |
| UBE2E3        | 0.60 |
| UBE2H         | 0.60 |
| UBE2W         | 0.63 |
| UBQLN2        | 0.63 |
| UBXN4         | 0.56 |
| UGP2          | 0.63 |
| UNKL          | 0.60 |
| USP35         | 0.66 |
| UTY           | 0.66 |
| VCP           | 0.65 |



---

|                      |      |
|----------------------|------|
| VDAC1                | 0.57 |
| VOPP1                | 0.64 |
| VPS41                | 0.60 |
| VWA5A                | 0.61 |
| WBP5                 | 0.53 |
| WDR66                | 0.61 |
| WNT5A                | 0.56 |
| WTH3DI               | 0.63 |
| WWC1                 | 0.59 |
| XRCC6BP1             | 0.60 |
| YIPF5                | 0.65 |
| YTHDC2               | 0.52 |
| ZBTB38               | 0.63 |
| ZC3H6                | 0.63 |
| ZCRB1                | 0.56 |
| ZEB1                 | 0.65 |
| ZFP14                | 0.53 |
| ZFYVE28              | 0.56 |
| ZKSCAN3              | 0.65 |
| ZKSCAN4              | 0.62 |
| ZMAT3                | 0.53 |
| ZMYM1                | 0.66 |
| ZMYM6                | 0.61 |
| ZNF10                | 0.59 |
| ZNF175               | 0.67 |
| ZNF221               | 0.56 |
| ZNF248               | 0.57 |
| ZNF266               | 0.65 |
| ZNF292               | 0.59 |
| ZNF32                | 0.59 |
| ZNF33A               | 0.58 |
| ZNF33B               | 0.65 |
| ZNF345               | 0.58 |
| ZNF417,ZNF418,ZNF814 | 0.60 |
| ZNF434               | 0.66 |
| ZNF548               | 0.66 |
| ZNF561               | 0.65 |
| ZNF567               | 0.67 |
| ZNF571               | 0.53 |
| ZNF587               | 0.56 |
| ZNF589               | 0.61 |
| ZNF624               | 0.61 |
| ZNF772               | 0.62 |

---

|         |      |
|---------|------|
| ZNF880  | 0.62 |
| ZSCAN30 | 0.67 |
| ZSWIM3  | 0.60 |
| ZSWIM5  | 0.56 |

---

The relative gene expression was compared with the gene expression of hMVEC precultured in hypoxia and stimulated with VEGF-A/TNF- $\alpha$  (n=4).
