# Supplementary material for: Identification of HIF-2α-regulated genes that play a role in human microvascular endothelial sprouting during prolonged hypoxia in vitro
Source: Springer Nature journal article supplement (doi:10.1007/s10456-016-9527-4), 2016-10-03
Supplement: MOESM3 [file 10806742]

**Supplementary Table 3. Gene expression data from RNA-sequencing; the HIF $\alpha$  subunits.**

| <b>Gene Name</b>                        | <b>Hypoxia</b> | <b>Si-HIF-2<math>\alpha</math></b> | <b>Scrambled</b> |
|-----------------------------------------|----------------|------------------------------------|------------------|
| <b>HIF-1<math>\alpha</math> (HIF1A)</b> | 0.5-fold *     | 1.3-fold (ns)                      | 1.1-fold (ns)    |
| <b>HIF-2<math>\alpha</math> (EPAS1)</b> | 0.7-fold *     | 0.15-fold **                       | 0.75-fold *      |
| <b>HIF-3<math>\alpha</math> (HIF3A)</b> | 11-fold **     | 0.25-fold **                       | 0.4-fold **      |

The relative gene expression in prolonged hypoxia was compared with the gene expression in normoxia, the gene expression with si-HIF-2 $\alpha$  and scrambled was compared with hypoxia upon VEGF-A/TNF- $\alpha$  stimulation (n=4).
